# Supplementary material
Source: PubMed Central journal article supplement (PMC2866077)

Sample subject: Old group

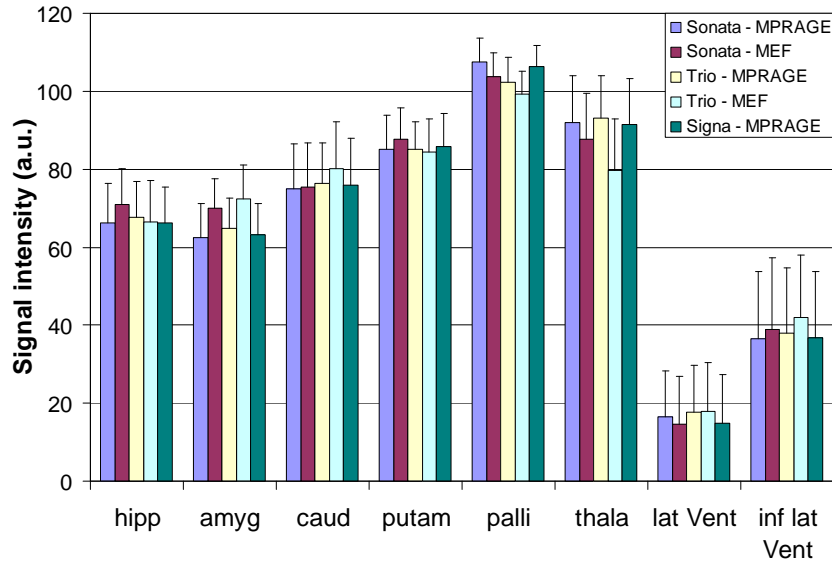

Sample subject: Young group

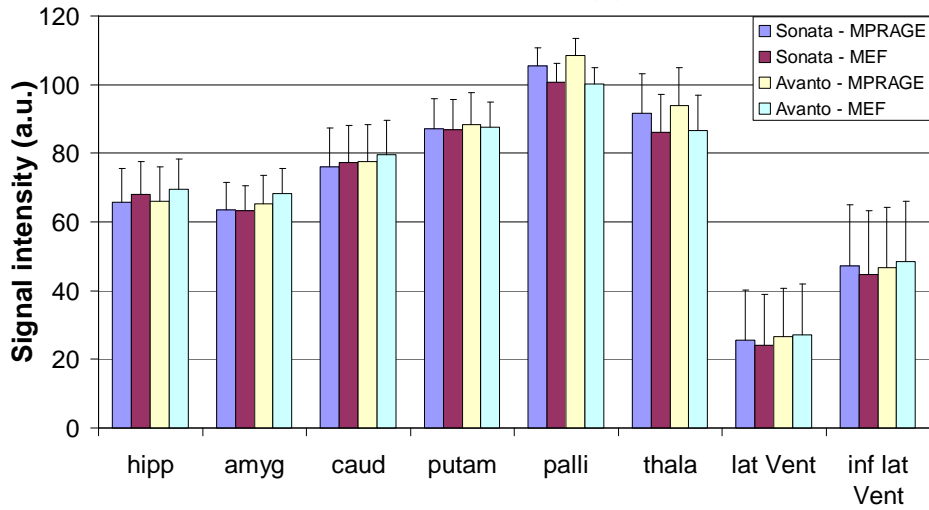

Supplement: NIHMS195969-supplement-01.pdf [file NIHMS195969-supplement-01.pdf]

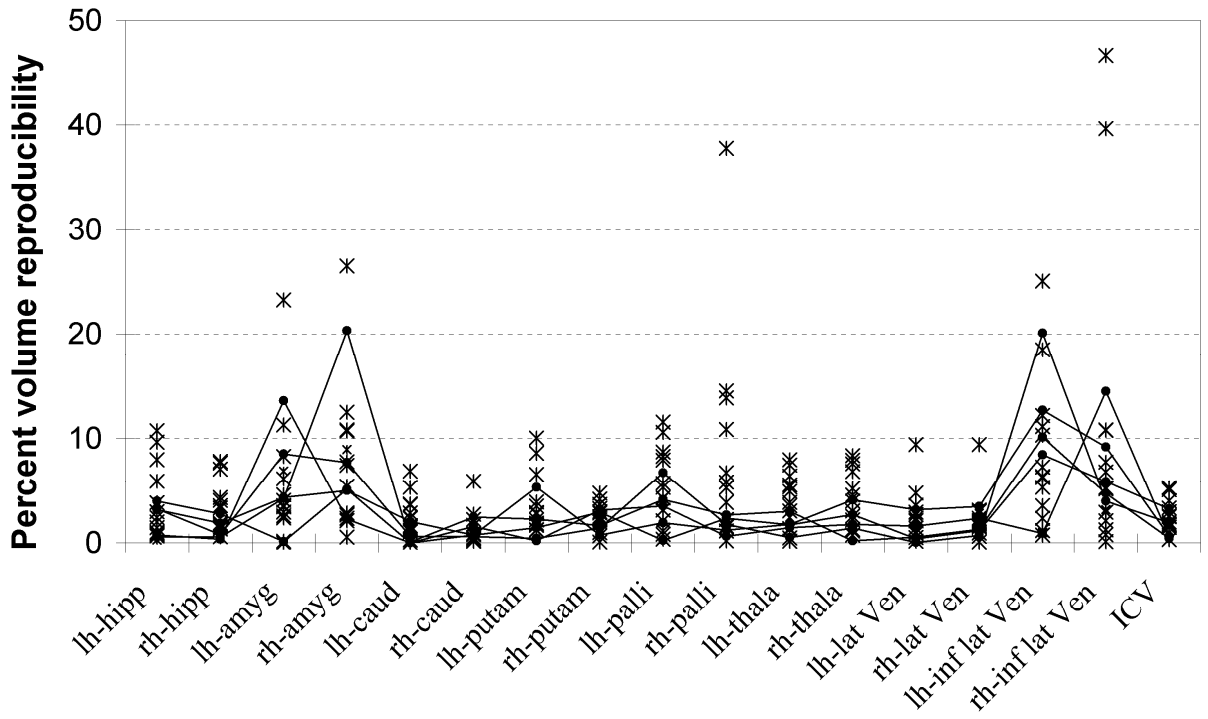

Supplement: NIHMS195969-supplement-02.pdf [file NIHMS195969-supplement-02.pdf]

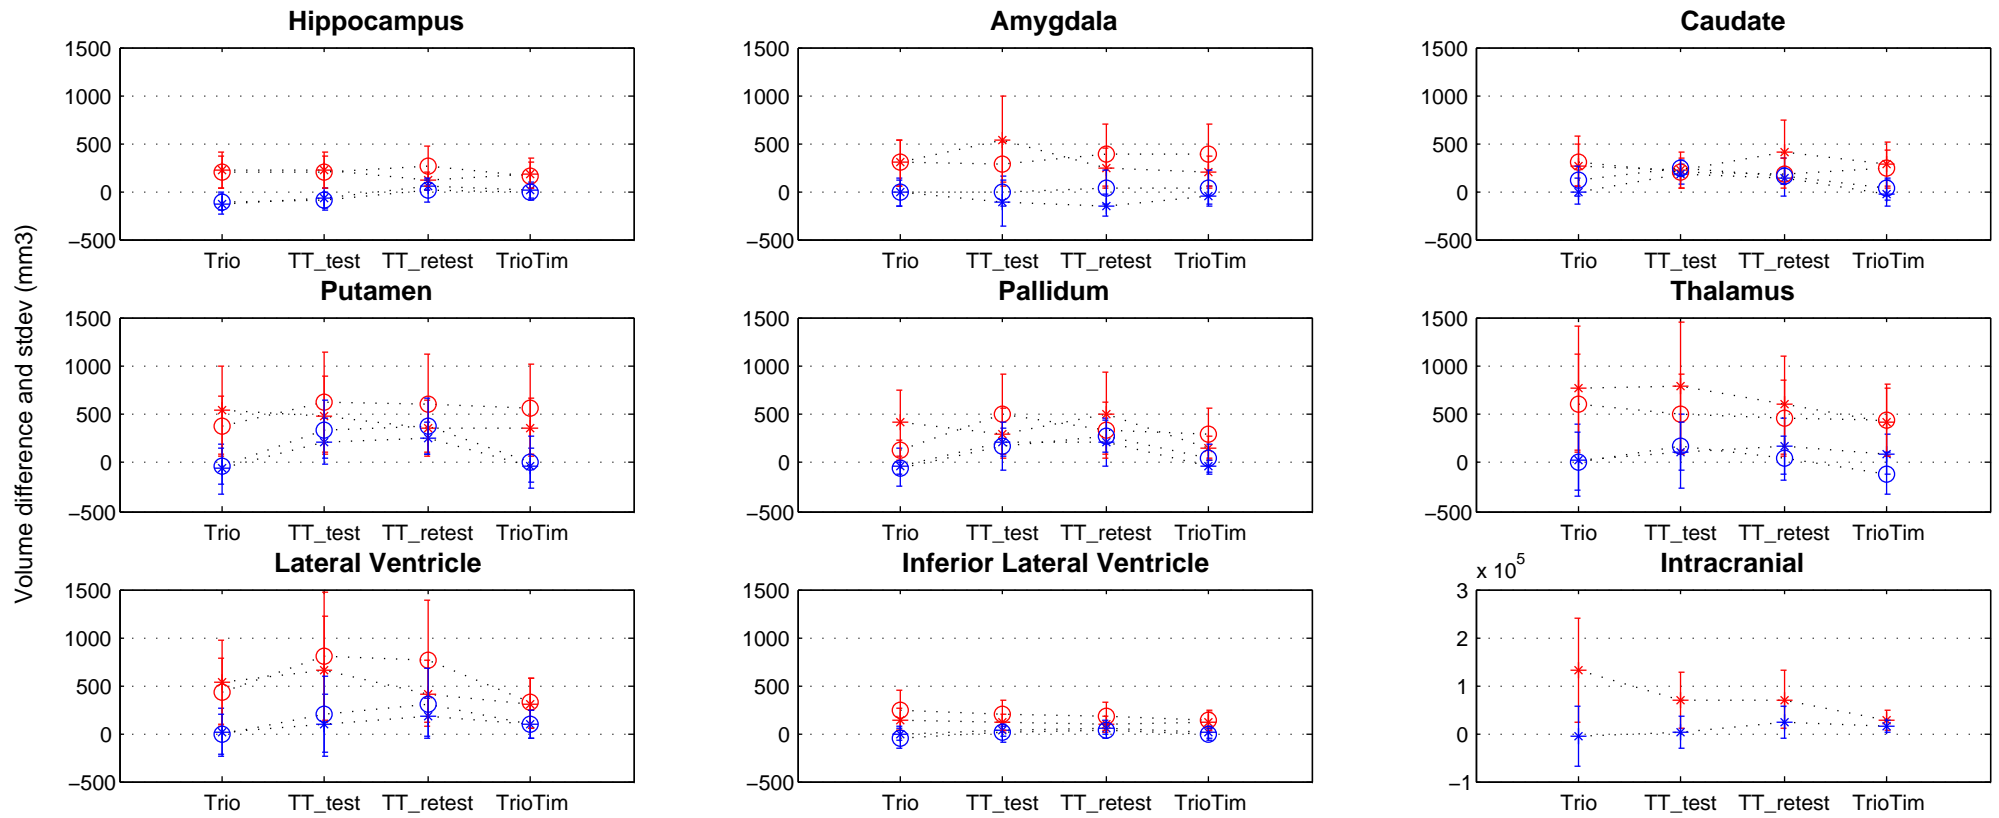

Supplement: NIHMS195969-supplement-03.pdf [file NIHMS195969-supplement-03.pdf]

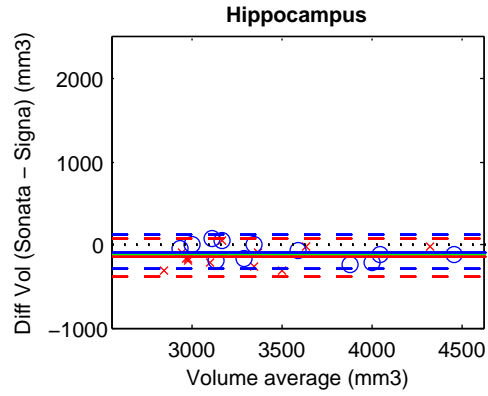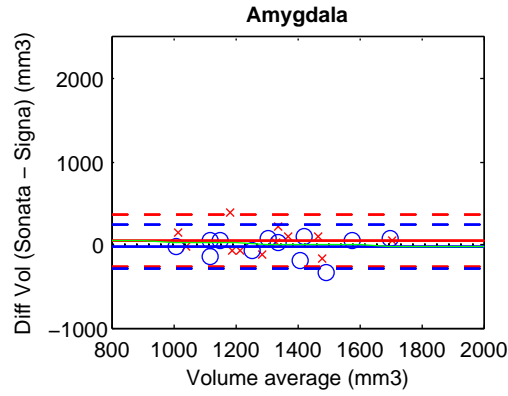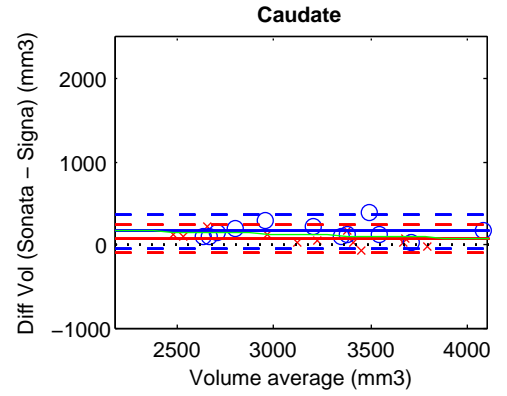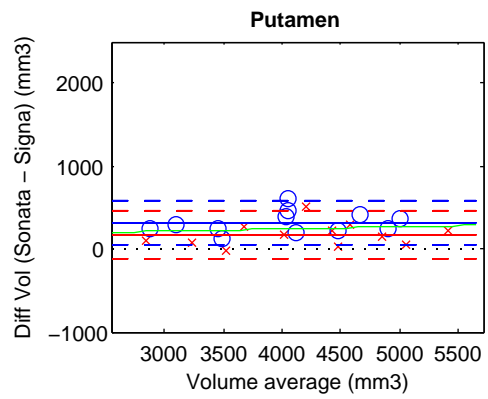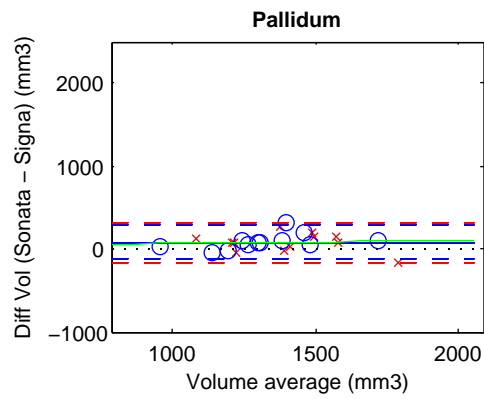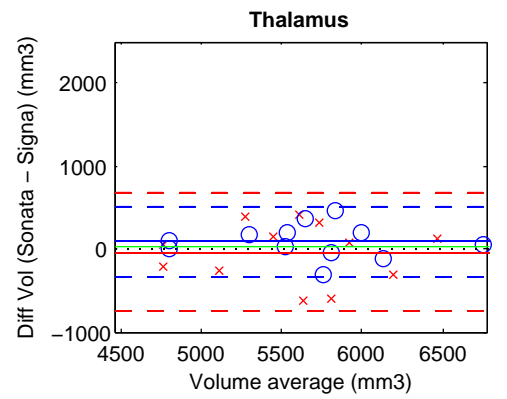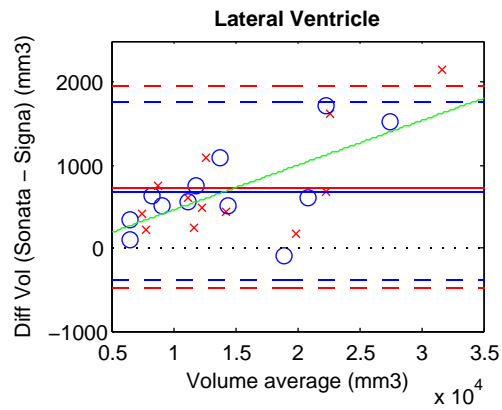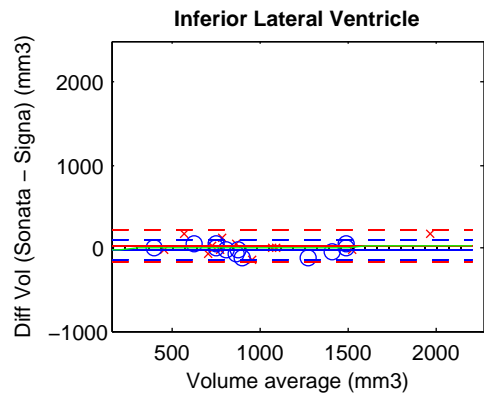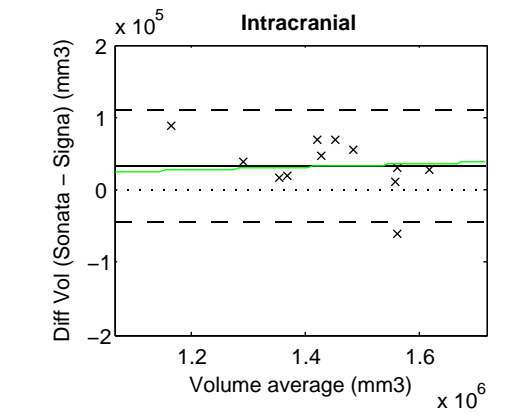

Supplement: NIHMS195969-supplement-04.pdf [file NIHMS195969-supplement-04.pdf]

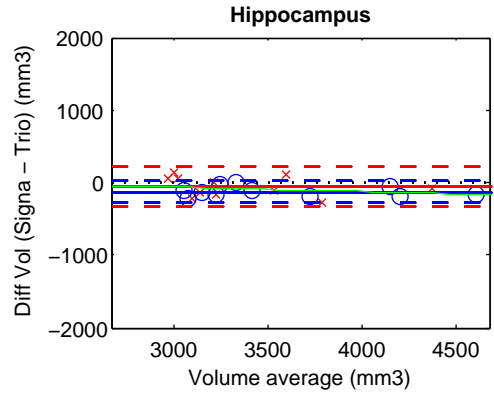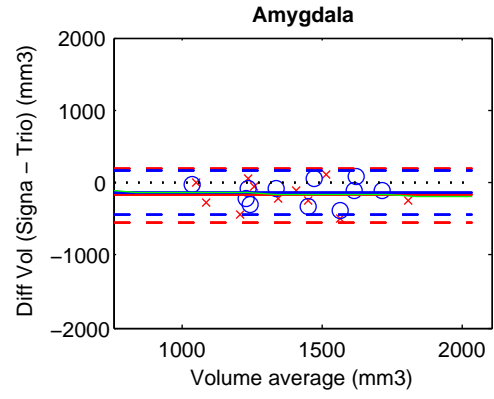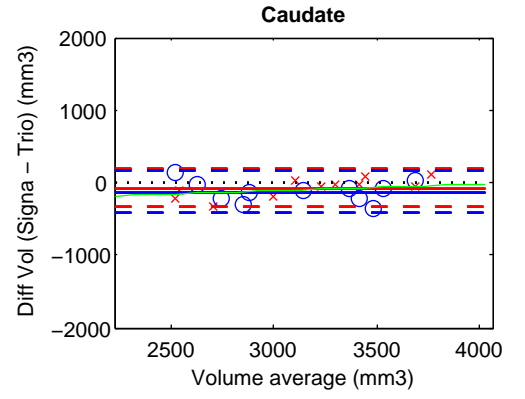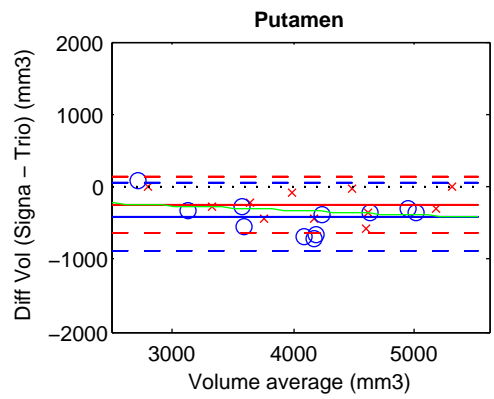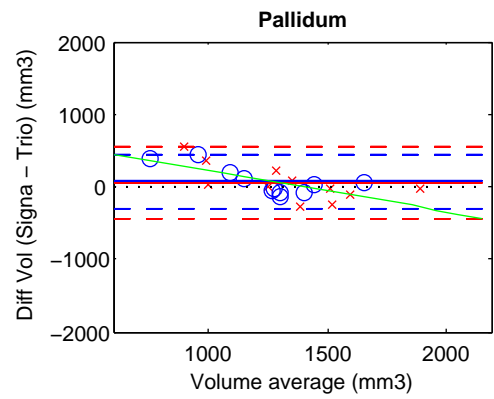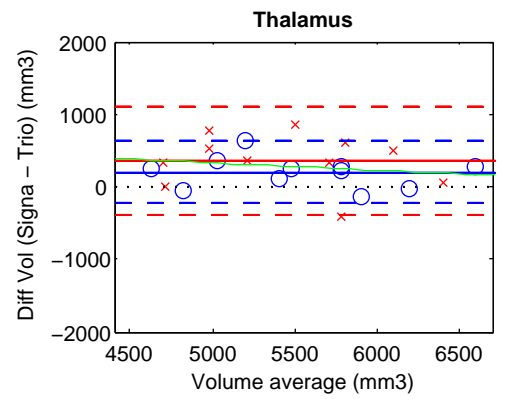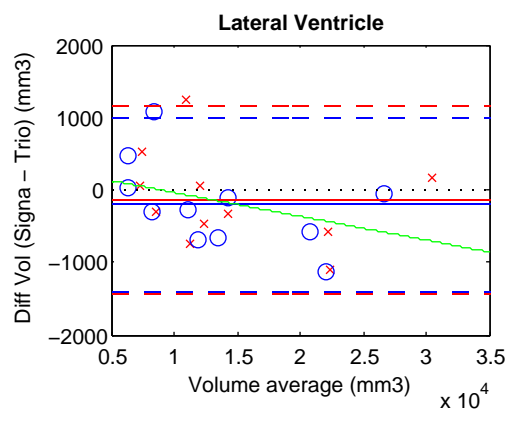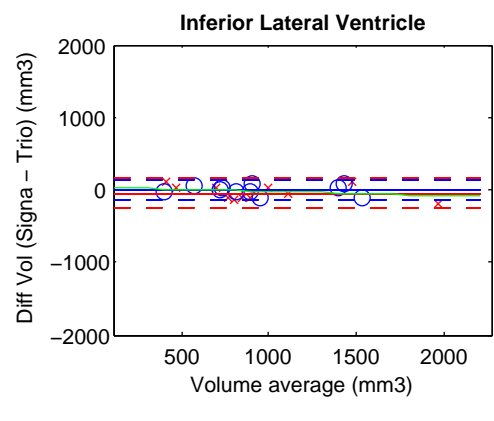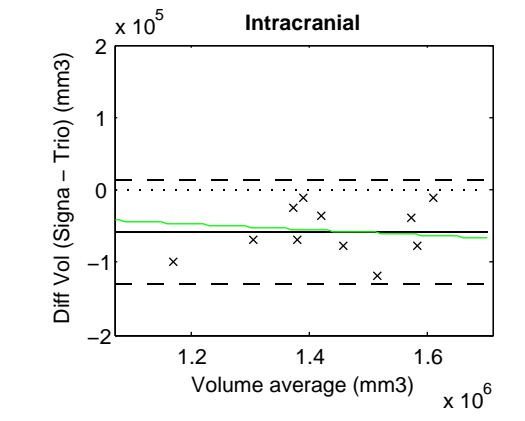

Supplement: NIHMS195969-supplement-05.pdf [file NIHMS195969-supplement-05.pdf]
